# Supplementary material
Source: MDPI journal article supplement (https://www.mdpi.com/1424-8247/16/7/975)
Supplement: s1 [file s1]

Table S1. Effect of screened compounds on DRAK2 activity at a concentration of 20  $\mu$ M

| No.                | Concentration | Result Type | Result           |
|--------------------|---------------|-------------|------------------|
| JY-01519(Luteolin) | 20 $\mu$ M    | %Activity   | 7.74 +/- 1.75    |
| JY-01522           | 20 $\mu$ M    | %Activity   | 94.17 +/- 6.84   |
| JY-01523           | 20 $\mu$ M    | %Activity   | 66.57 +/- 5.02   |
| JY-01524           | 20 $\mu$ M    | %Activity   | 90.62 +/- 14.87  |
| JY-01526           | 20 $\mu$ M    | %Activity   | 54.19 +/- 1.74   |
| JY-01527           | 20 $\mu$ M    | %Activity   | 66.35 +/- 6.03   |
| JY-01529           | 20 $\mu$ M    | %Activity   | 68.73 +/- 7.78   |
| JY-01530           | 20 $\mu$ M    | %Activity   | 79.49 +/- 4.96   |
| JY-01531           | 20 $\mu$ M    | %Activity   | 64.85 +/- 1.14   |
| JY-01532           | 20 $\mu$ M    | %Activity   | 71.04 +/- 6.00   |
| JY-01536           | 20 $\mu$ M    | %Activity   | 89.42 +/- 5.85   |
| JY-01540           | 20 $\mu$ M    | %Activity   | 37.86 +/- 6.00   |
| JY-01541           | 20 $\mu$ M    | %Activity   | 57.94 +/- 4.99   |
| JY-01542           | 20 $\mu$ M    | %Activity   | 62.09 +/- 4.02   |
| JY-01543           | 20 $\mu$ M    | %Activity   | 82.72 +/- 3.50   |
| JY-01545           | 20 $\mu$ M    | %Activity   | 58.23 +/- 0.59   |
| JY-01546           | 20 $\mu$ M    | %Activity   | 50.13 +/- 8.84   |
| JY-01547           | 20 $\mu$ M    | %Activity   | 42.79 +/- 1.24   |
| JY-01548           | 20 $\mu$ M    | %Activity   | 67.75 +/- 2.59   |
| JY-01549           | 20 $\mu$ M    | %Activity   | 39.83 +/- 3.97   |
| JY-01550           | 20 $\mu$ M    | %Activity   | 41.67 +/- 0.74   |
| JY-01551           | 20 $\mu$ M    | %Activity   | 46.50 +/- 0.31   |
| JY-01552           | 20 $\mu$ M    | %Activity   | 70.31 +/- 0.46   |
| JY-01553           | 20 $\mu$ M    | %Activity   | 56.54 +/- 1.82   |
| JY-01554           | 20 $\mu$ M    | %Activity   | 64.38 +/- 10.76  |
| JY-01555           | 20 $\mu$ M    | %Activity   | 62.46 +/- 10.21  |
| JY-01556           | 20 $\mu$ M    | %Activity   | 75.10 +/- 7.60   |
| JY-01558           | 20 $\mu$ M    | %Activity   | 35.54 +/- 5.27   |
| JY-02089           | 20 $\mu$ M    | %Activity   | 132.98 +/- 8.06  |
| JY-02090           | 20 $\mu$ M    | %Activity   | 99.30 +/- 17.26  |
| JY-02091           | 20 $\mu$ M    | %Activity   | 114.00 +/- 3.33  |
| JY-02092           | 20 $\mu$ M    | %Activity   | 100.80 +/- 3.01  |
| JY-02093           | 20 $\mu$ M    | %Activity   | 100.85 +/- 3.11  |
| JY-02094           | 20 $\mu$ M    | %Activity   | 94.30 +/- 8.89   |
| JY-02095           | 20 $\mu$ M    | %Activity   | 96.97 +/- 12.62  |
| JY-02096           | 20 $\mu$ M    | %Activity   | 87.74 +/- 4.46   |
| JY-02097           | 20 $\mu$ M    | %Activity   | 87.24 +/- 3.42   |
| JY-02098           | 20 $\mu$ M    | %Activity   | 101.29 +/- 9.46  |
| JY-02099           | 20 $\mu$ M    | %Activity   | 121.20 +/- 4.76  |
| JY-02100           | 20 $\mu$ M    | %Activity   | 107.05 +/- 14.73 |
| JY-02101           | 20 $\mu$ M    | %Activity   | 124.97 +/- 1.60  |
| JY-02102           | 20 $\mu$ M    | %Activity   | 117.22 +/- 1.77  |
| JY-02103           | 20 $\mu$ M    | %Activity   | 120.93 +/- 1.52  |
| JY-02104           | 20 $\mu$ M    | %Activity   | 90.94 +/- 5.62   |
| JY-02105           | 20 $\mu$ M    | %Activity   | 115.96 +/- 2.70  |
| JY-02106           | 20 $\mu$ M    | %Activity   | 91.04 +/- 10.28  |
| JY-02107           | 20 $\mu$ M    | %Activity   | 84.23 +/- 5.15   |
| JY-02108           | 20 $\mu$ M    | %Activity   | 77.85 +/- 8.63   |

Table S1 Related to Figure 1. Effect of screened natural products on DRAK2 activity

The kinase activity of DRAK2 after treatment with natural product at a concentration of 20  $\mu$ M.

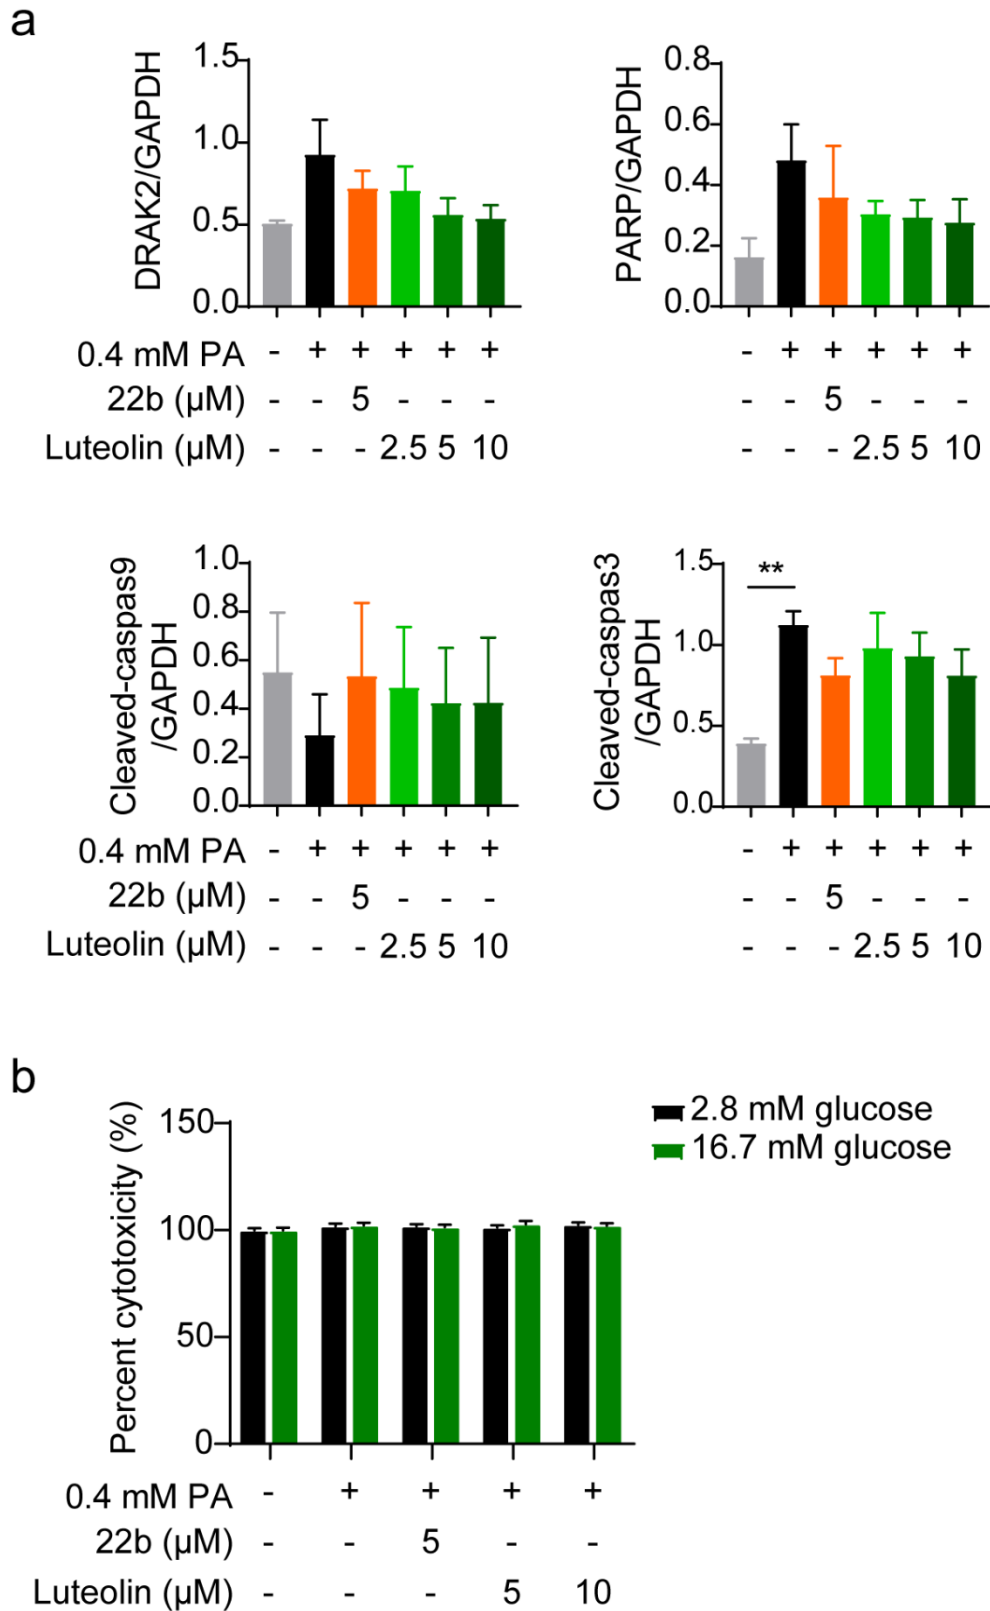

**Figure S1. Related to Figure 2. Contents of LDH in KRBH solution after therapy**

(a). Grayscale analysis of Figure 2c, n=3. (b). LDH levels in KRBH solution measured by CytoTox-ONE™ Homogeneous Membrane Integrity Assay, n=3.

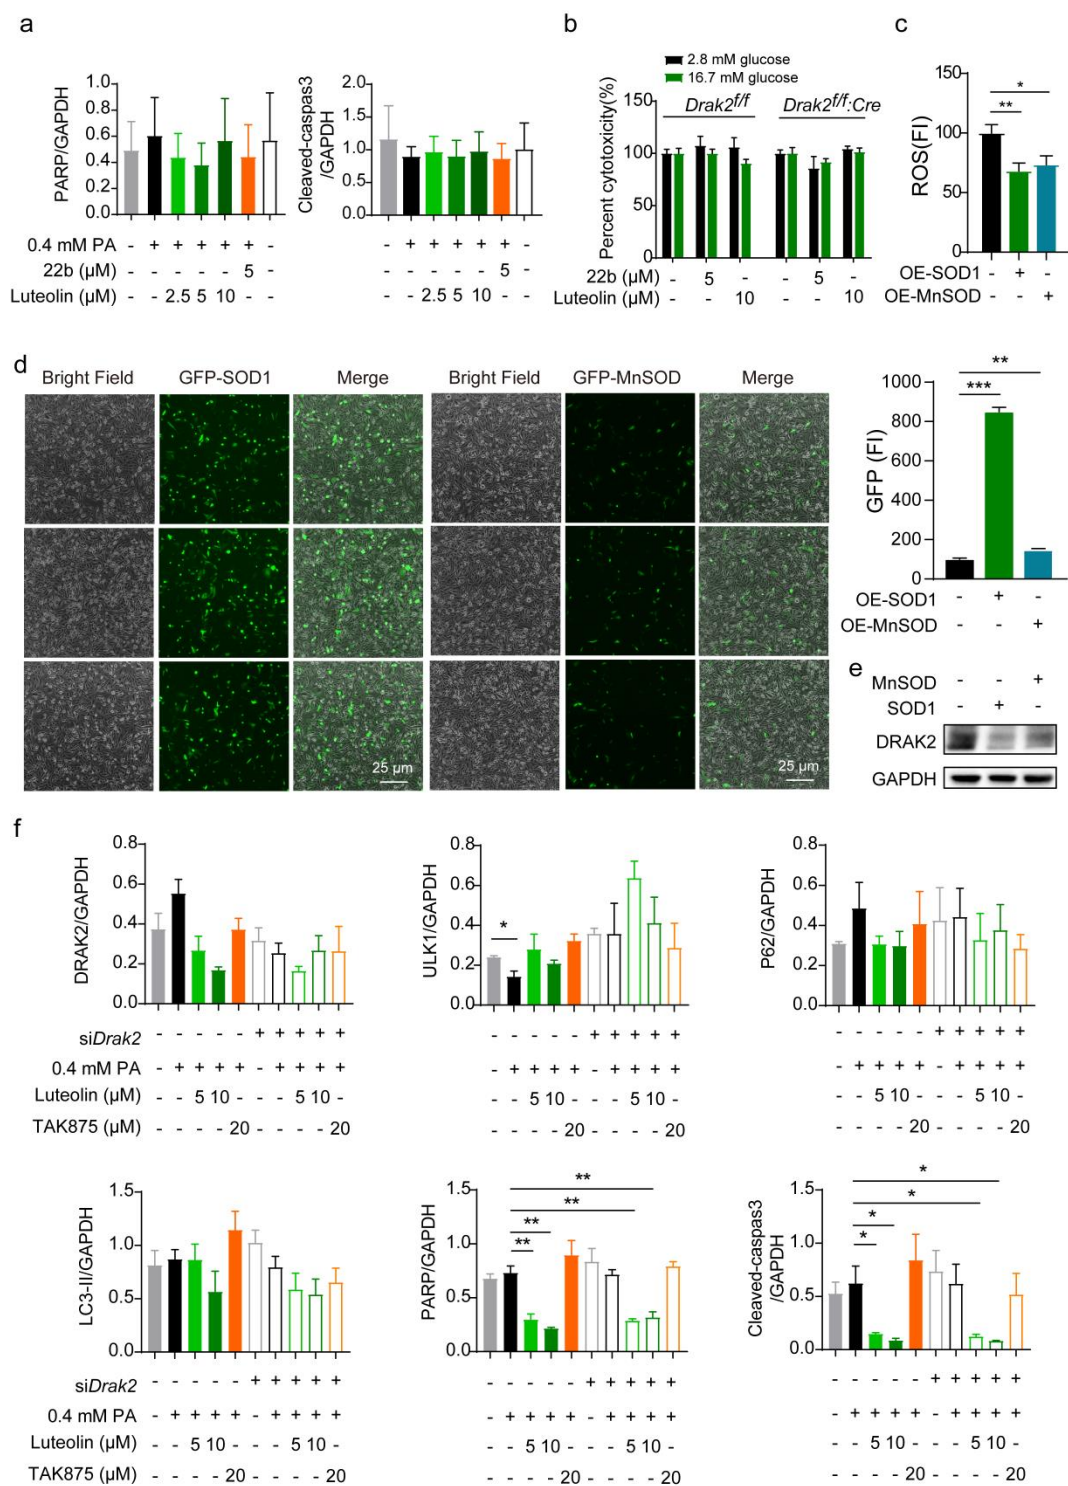

**Figure S2. Related to Figure 3. Content of LDH in KRBH solution after therapy and SOD fluorescence intensity in CHO cells**

(a). Grayscale analysis of Figure 3a, n= 3. (b). LDH levels in KRBH solution measured by CytoTox-ONE™ Homogeneous Membrane Integrity Assay, n= 3. (c)-(d). Overexpressing SOD1 or MnSOD in CHO cells. (c) The ROS levels in CHO cells, n= 4. (d) Fluorescence intensity and quantification of SOD in CHO cells after overexpressing SOD, n= 6. (e). Western-blot analysis of DRAK2 protein levels in response to overexpression of SOD and MnSOD. (f). Grayscale analysis of Figure 3d, n= 3. \*  $P < 0.05$ , \*\*  $P < 0.01$ , \*\*\*  $P < 0.001$ .

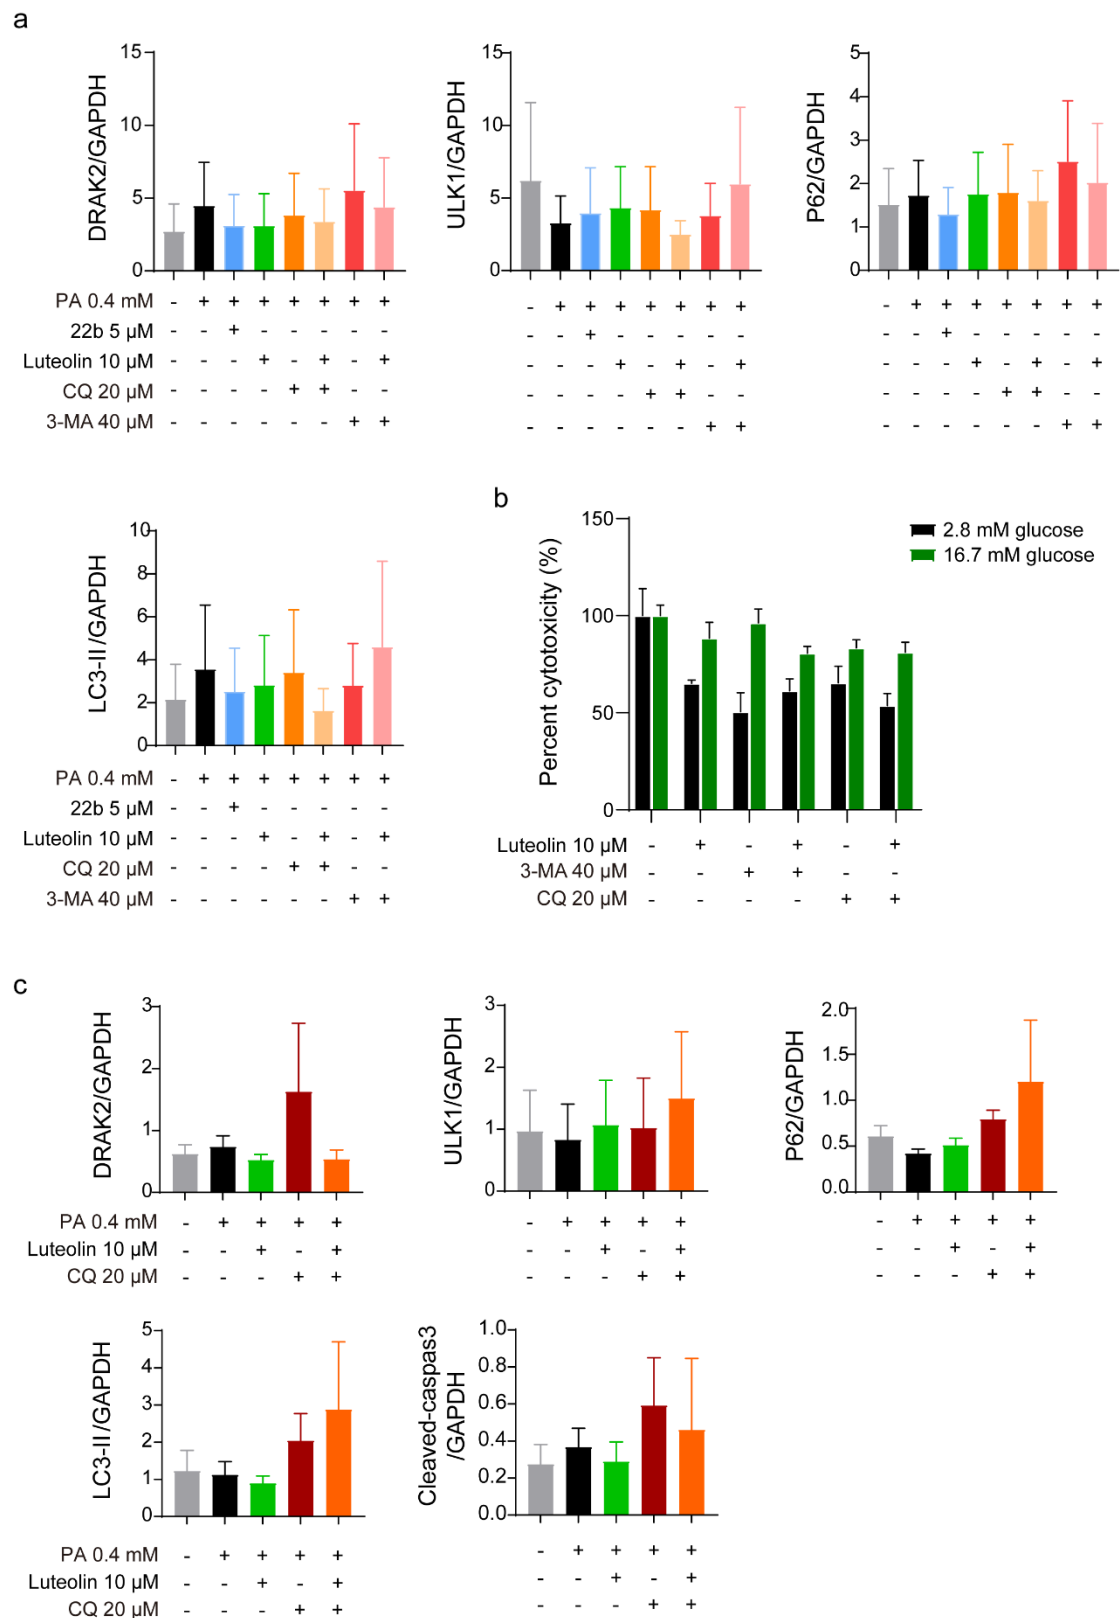

**Figure S3. Related to Figure 4. Content of LDH in KRBH solution after therapy**

(a). Grayscale analysis of Figure 4b, n= 3. (b). LDH levels in KRBH solution measured by CytoTox-ONE™ Homogeneous Membrane Integrity Assay, n= 3. (c). Grayscale analysis of Figure 4d, n= 3.

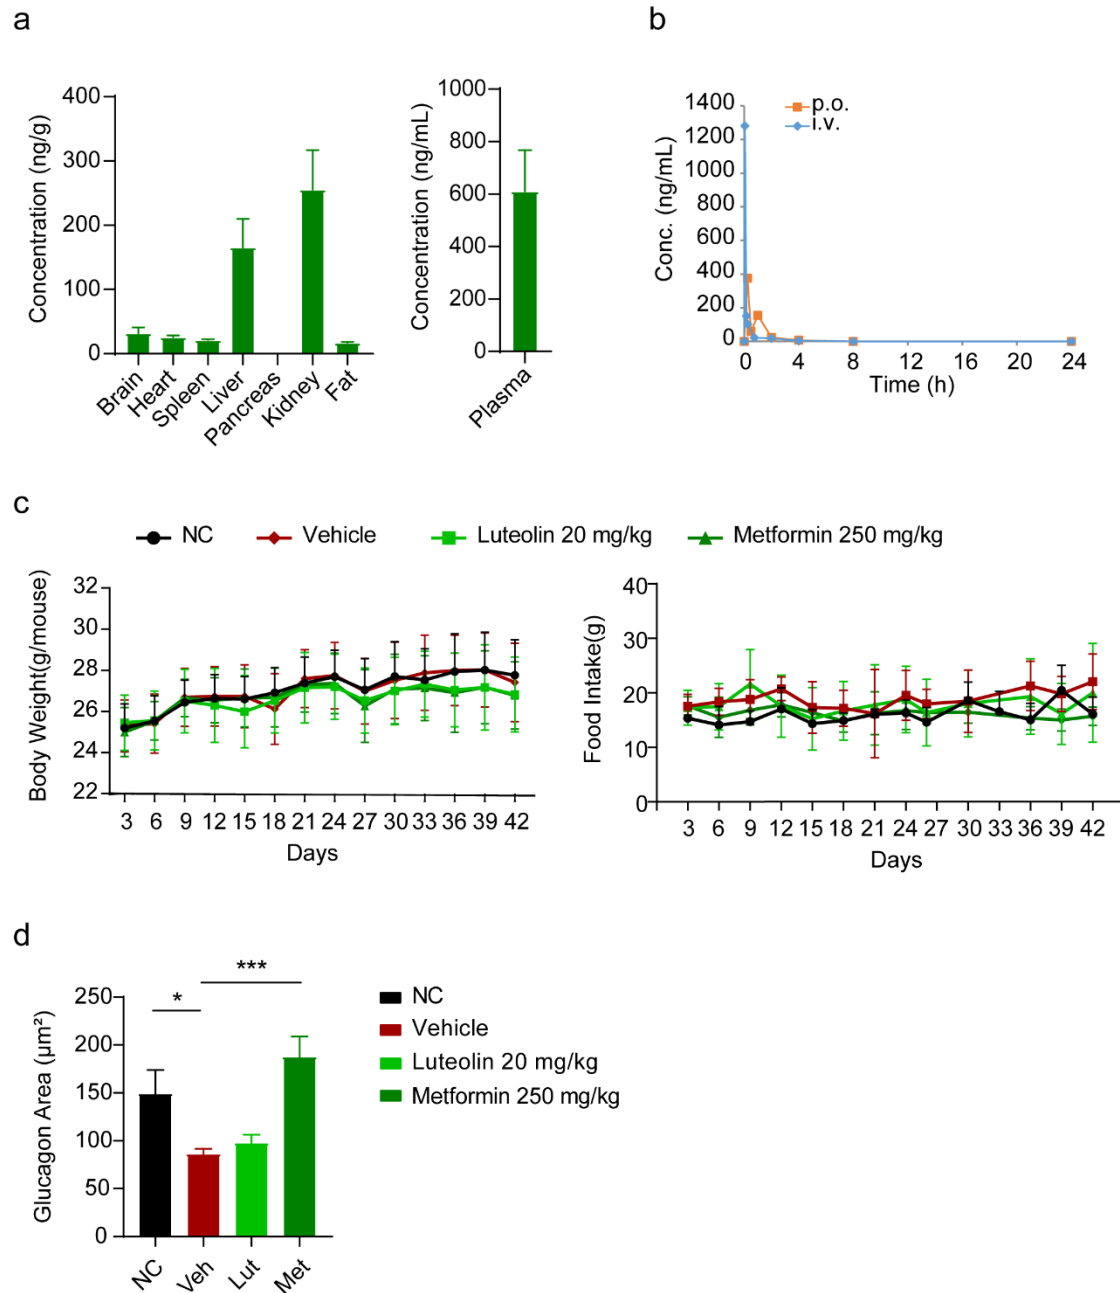

**Figure S4. Related to Figure 5. Protective effect of luteolin on mice**

(a). Tissue distribution of luteolin by oral on ICR mice,  $n=4$ . (b). Drug-time curve of luteolin *in vivo*. (c). Body weight on the last day of dosing and the average food intake during the 42 days treatment period,  $n=8-13$ . (d). Area of glucagon assessed by immunofluorescence,  $n=20$ .

Table S2. Pharmacokinetics parameters of Luteolin after p.o and i.v. administration in mouse

| Administration | T <sub>1/2</sub><br>(h) | T <sub>max</sub><br>(h) | C <sub>max</sub><br>(ng/mL) | AUC <sub>last</sub><br>(h*ng/mL) | AUC <sub>INF_obs</sub><br>(h*ng/mL) | CL <sub>obs</sub><br>mL/min/kg | MRT <sub>INF_obs</sub><br>(h) | Vss <sub>obs</sub><br>(mL/kg) | F<br>(%) |
|----------------|-------------------------|-------------------------|-----------------------------|----------------------------------|-------------------------------------|--------------------------------|-------------------------------|-------------------------------|----------|
| p.o.           | 0.714                   | 0.25                    | 376                         | 241                              | 248                                 | -                              | 1.13                          | -                             | 34.4     |
| i.v.           | 1.36                    | -                       | -                           | 175                              | 184                                 | 453                            | 0.879                         | 23887                         |          |

Comment: N/A

**Table S2. Related to Figure 5. Concentration-time Data**

The pharmacokinetics parameters of luteolin after p.o. and i.v. administration in ICR mice
